# Supplementary material
Source: PubMed Central journal article supplement (PMC3660528)
Supplement: NIHMS450779-supplement-02.pdf [file NIHMS450779-supplement-02.pdf]

Fig. S1: Electron microscope images of A $\beta$ <sub>1-40</sub> fibrils prepared as described in “Methods” section. a) the batch used to prepare frozen solution A $\beta$ -VF fibrils; b) batch used to prepare frozen solution A $\beta$ -VG fibrils.

Fig. S2: DNP build-up curves measured using proton signals and <sup>13</sup>C-CP signals, monoexponential fitting curves are shown in red. a) A $\beta$ -VF fibrils in frozen solution, b) A $\beta$ -VF peptide in frozen solution, c) A $\beta$ -VG fibrils in frozen solution, d) transverse relaxation curves for samples in frozen solution.

Fig. S3: Schematic representation of relative orientation of CSA tensors in the molecular frame and with respect to each other.

Fig. S4: Series of simulated 2D patterns for a wide range of various ( $\phi, \psi$ ) angles. Spectral broadening is set to match the one found in room temperature measurements, exchange time 2.5 s

Fig. S5:  $\chi^2_{red}(\phi, \psi)$  plots for the best fits to individual 2D exchange spectra of A $\beta$ -VF fibrils with various  $\tau_{exchange}$ . (data are shown in Fig. 6), a)  $\tau_{exchange}=0.1$  s, b)  $\tau_{exchange}=0.5$  s, c)  $\tau_{exchange}=1.0$  s, d)  $\tau_{exchange}=2.5$  s, e)  $\tau_{exchange}=10$  s.

Fig. S6: RMSD plot for simulated data. The RMSD is calculated as

$$RMSD(\phi, \psi) = \sqrt{\sum_i^N (\lambda S_i(\phi, \psi) - \lambda S_i(\phi_0, \psi_0))^2}$$

, where a spectrum  $S_i$  simulated for specific  $(\phi_0, \psi_0)$  angles is compared to all other simulations, the optimal scaling factor  $\lambda$  is calculated

as  $\lambda = \frac{\sum_i^N S_i(\phi_0, \psi_0) S_i}{\sum_i^N S_i(\phi_0, \psi_0)^2}$     a)  $(\phi_0, \psi_0) = (-50^\circ, -60^\circ)$  ;    b)  $(\phi_0, \psi_0) = (-120^\circ, 120^\circ)$ ;    c)  $(\phi_0, \psi_0) = (-150^\circ, 150^\circ)$ ;    d)  $(\phi_0, \psi_0) = (-75^\circ, -150^\circ)$
