# Supplementary material
Source: PubMed Central journal article supplement (PMC3660528)

Supp. Fig.1

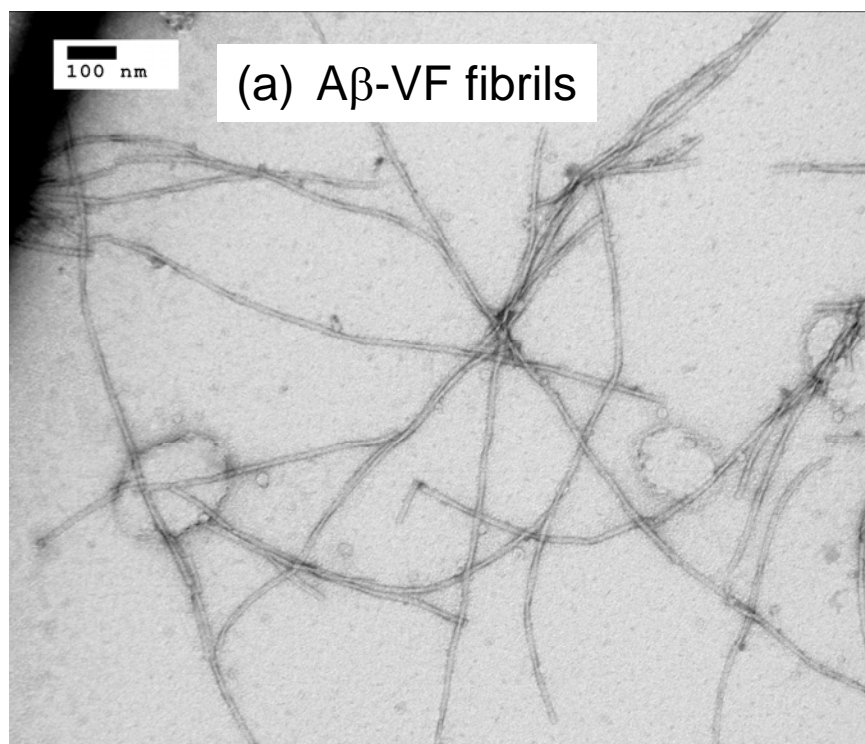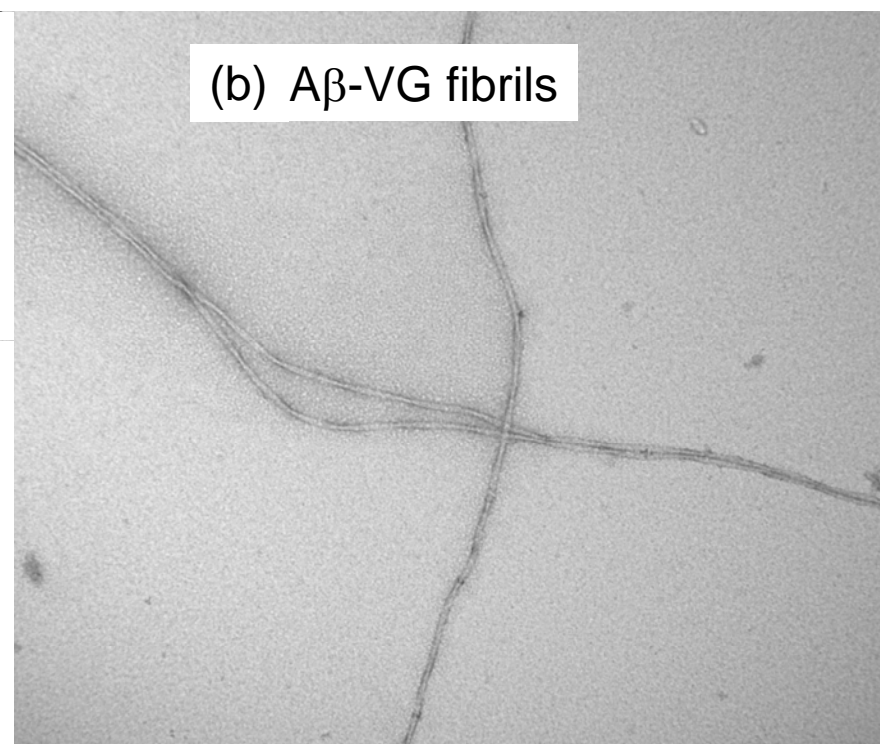

Supp. Fig. 2

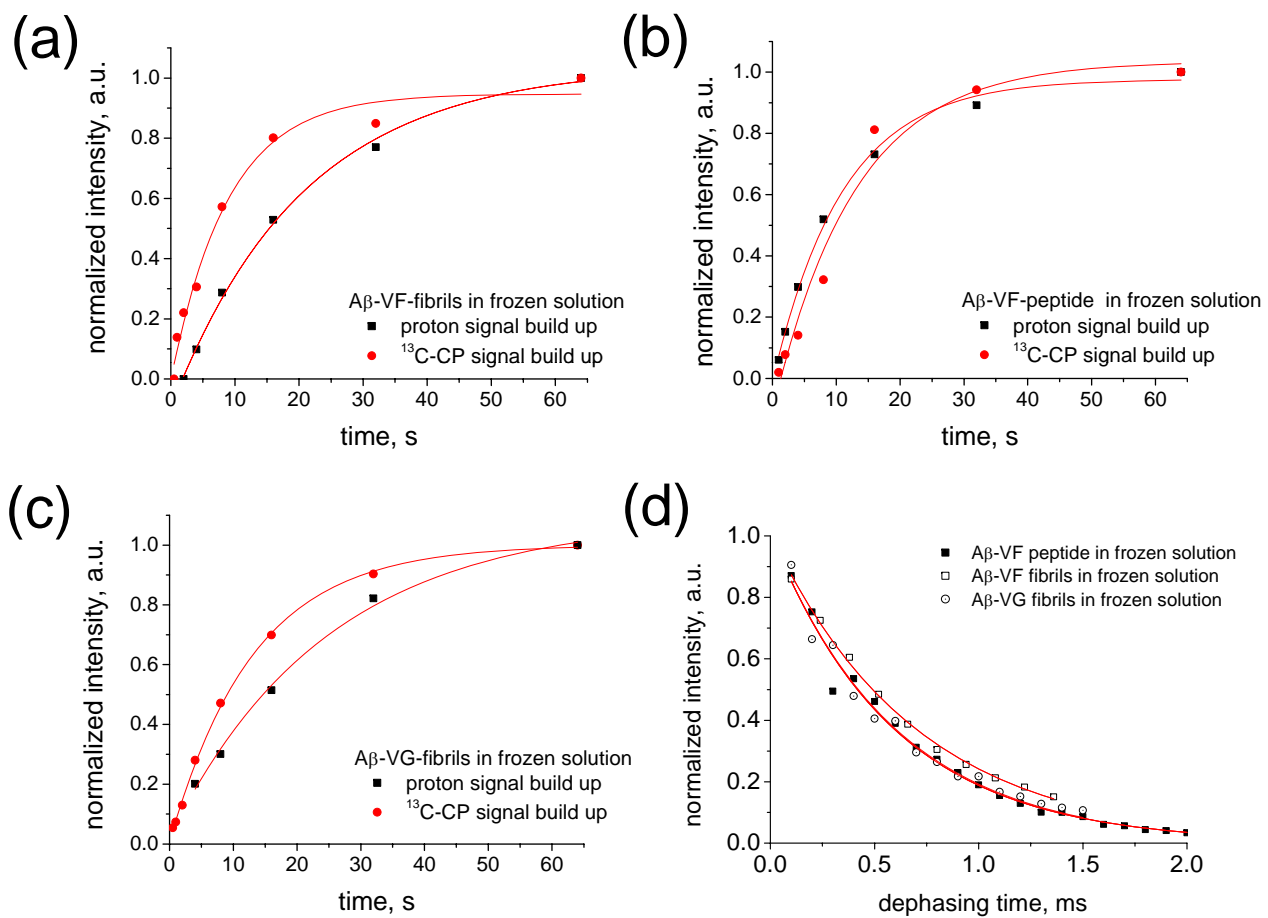

Supp .Fig. 3

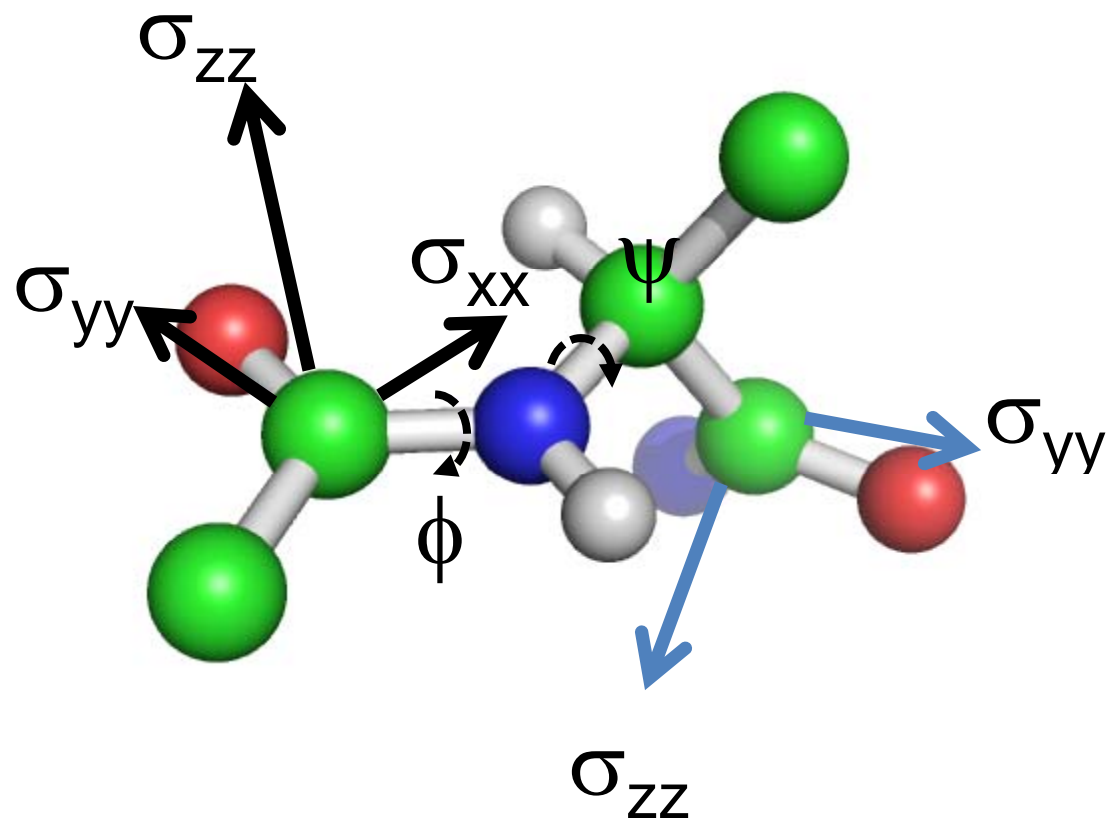

Supp. Fig. 4

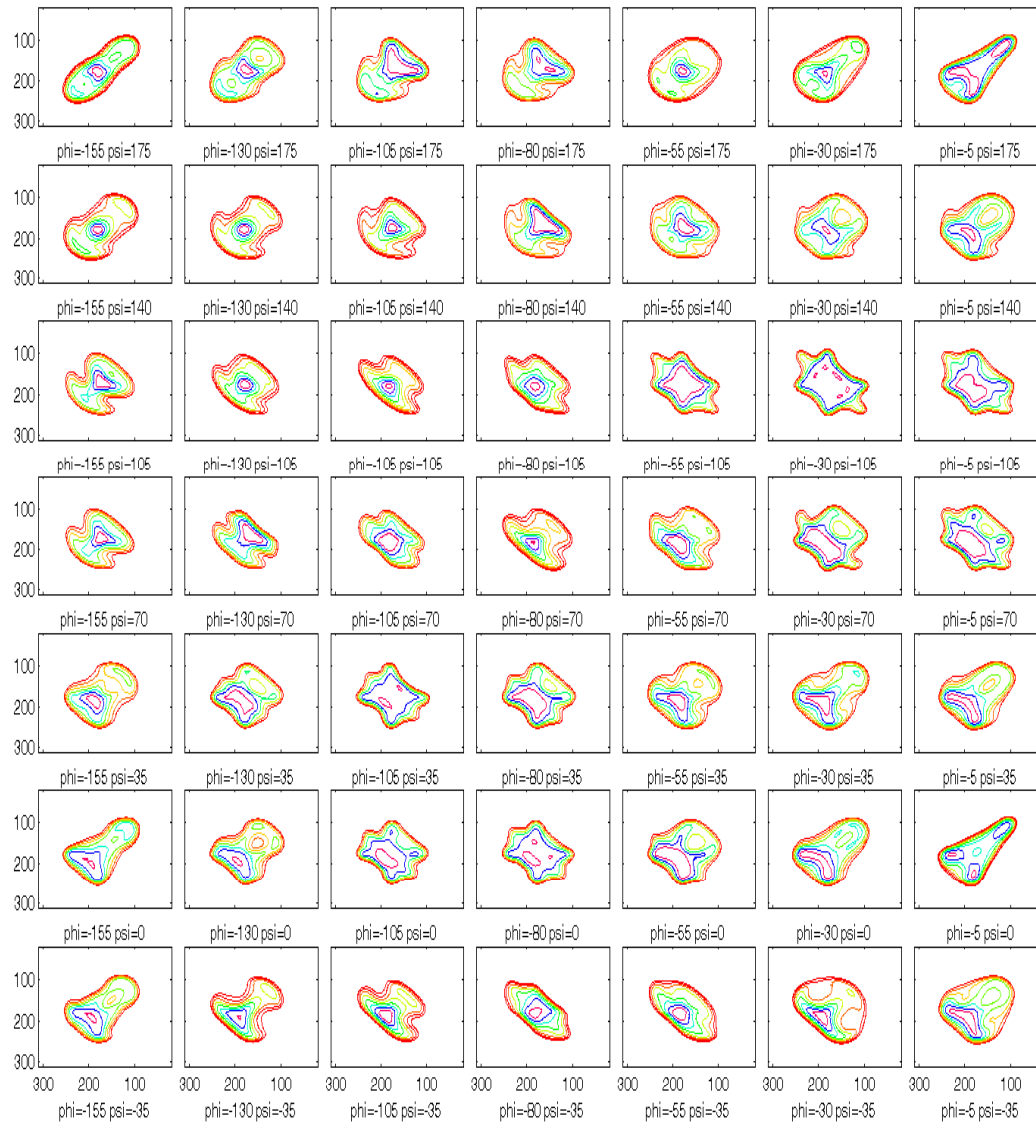

Supp. Fig.5

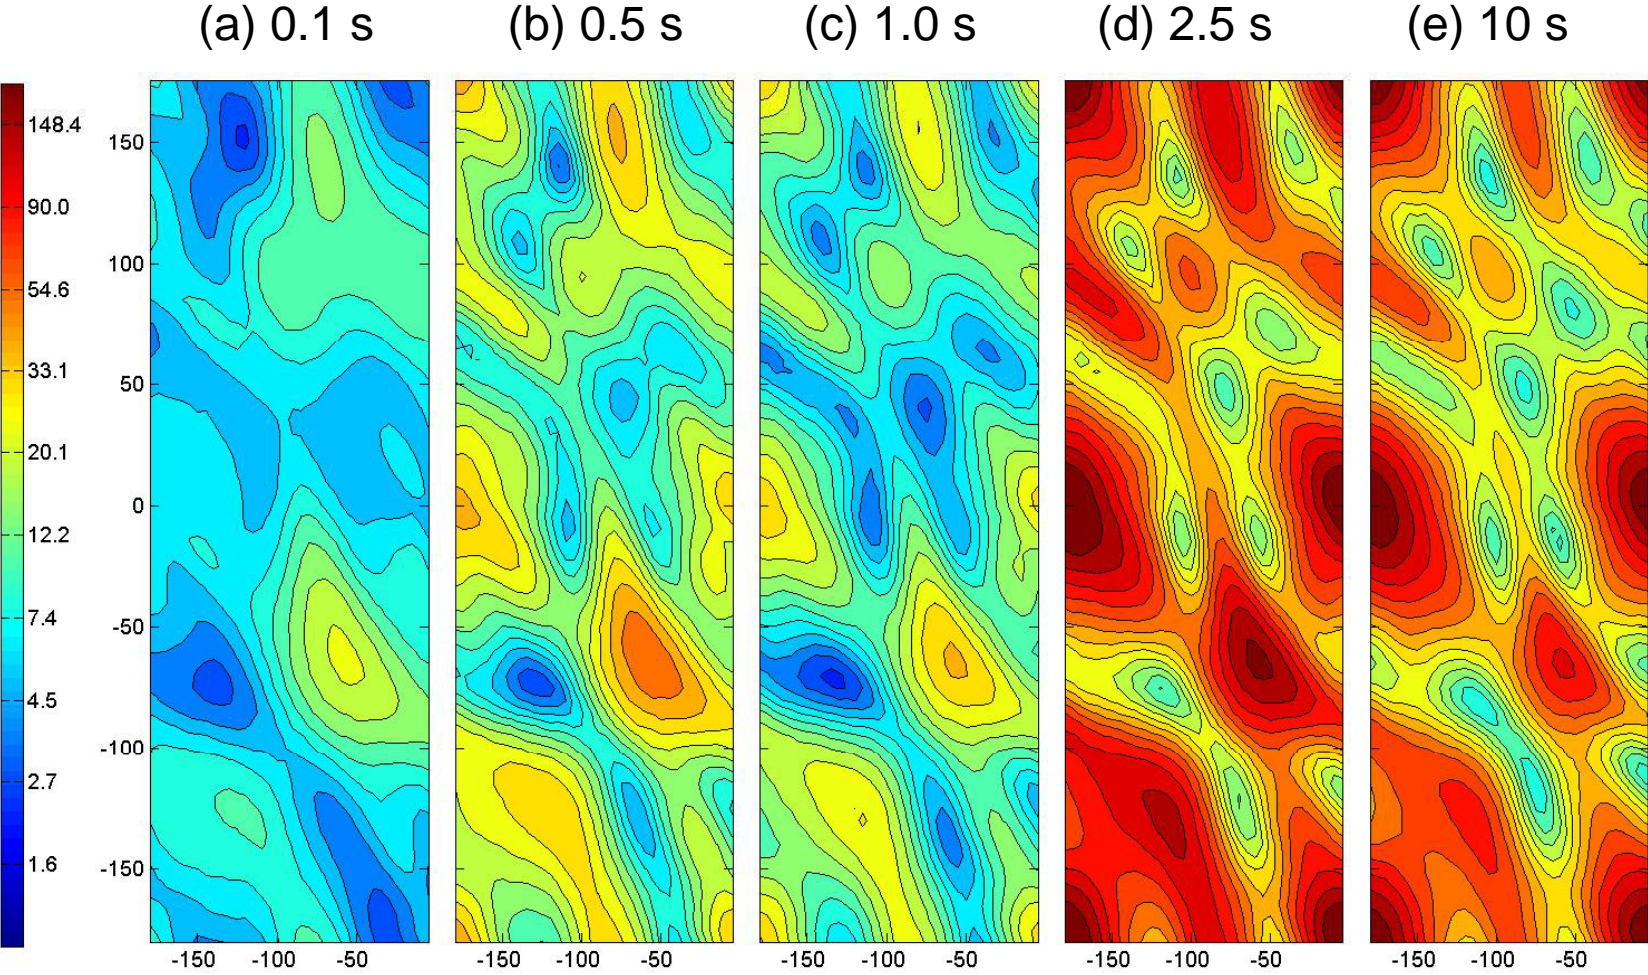



Supp. Fig. 6

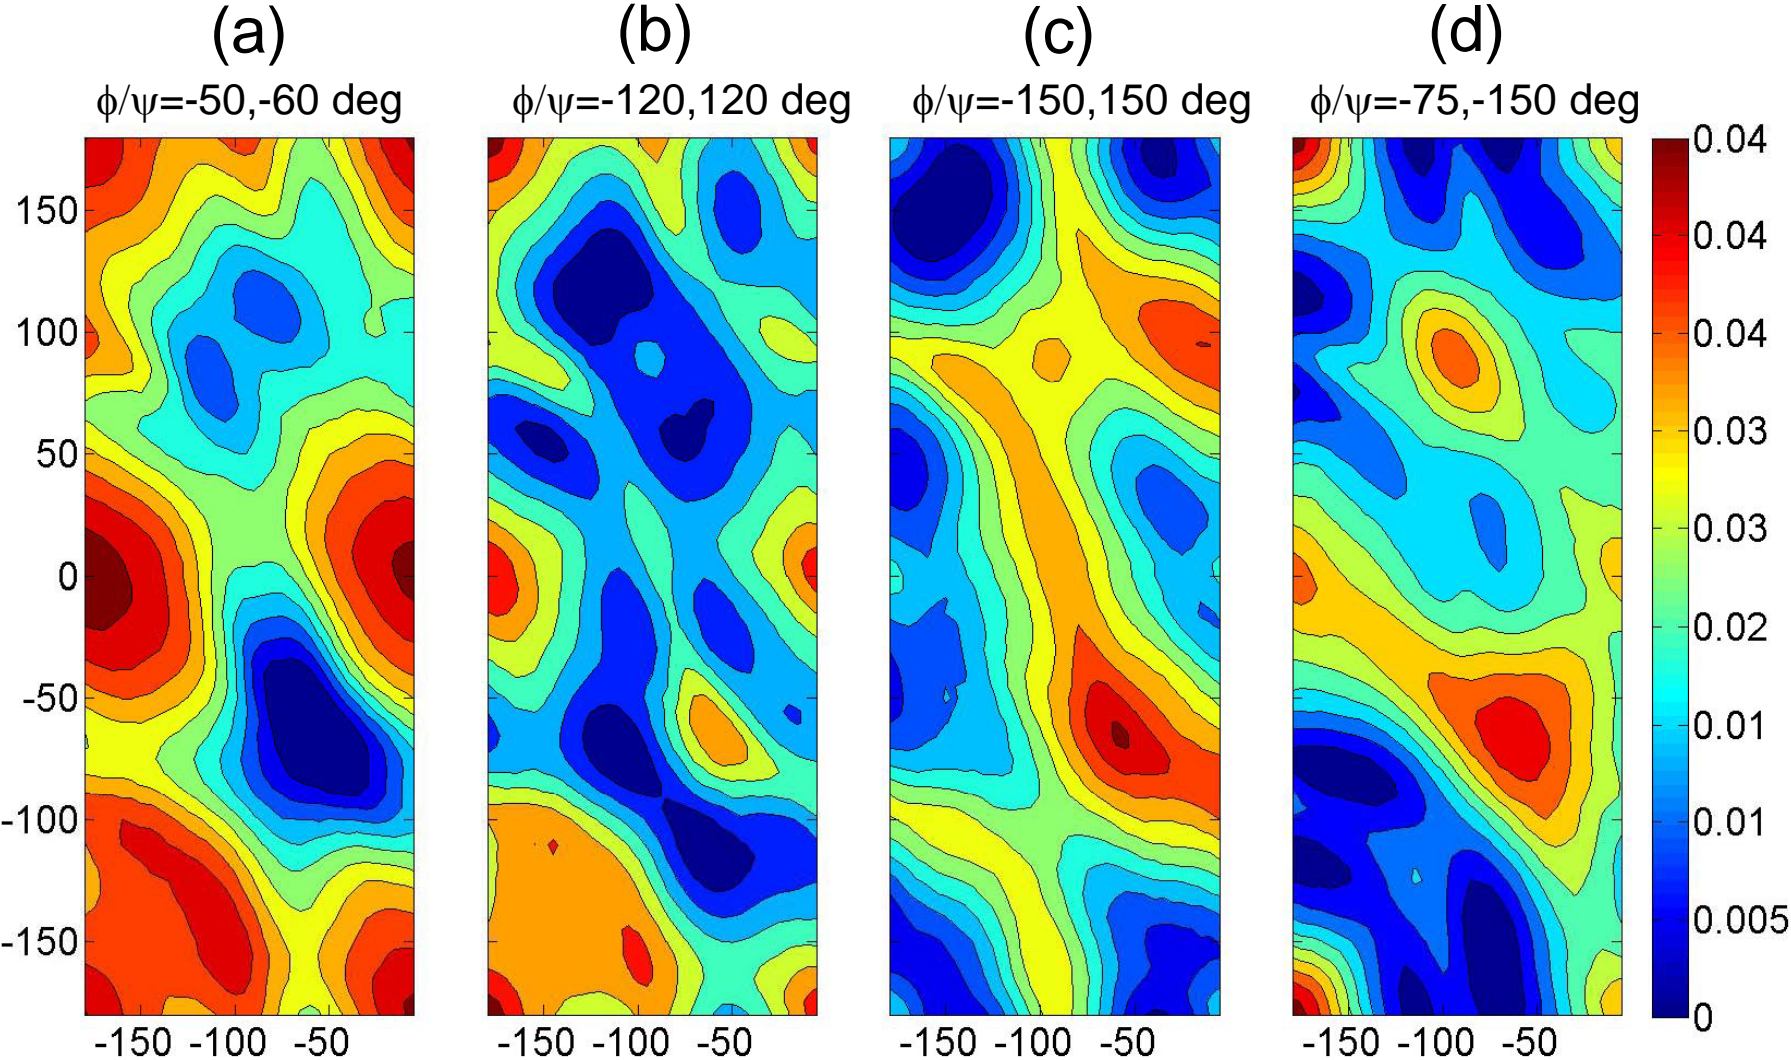

Supplement: NIHMS450779-supplement-01.pdf [file NIHMS450779-supplement-01.pdf]
